# Supplementary material for: A machian model as potential alternative to dark matter halo thesis in galactic rotational velocity prediction
Source: Frontiers journal article supplement (doi:10.3389/fspas.2024.1429235), 2024-08-01
Supplement: Table_1.xlsx [file Table_1.xlsx]

## Sheet: M31
r [kly]				r(d-du) [kg/m2]			in r(d-du) [kg/m]		l	dens [kg/m3]	u		l	speed smth	speed [km/s]	TRUE speed		dra smooth	dragging	d-du
0.1				1.34797e-05			0		0.1	1.42494e-23	2.2e-28		0.1	1	0	0		1	0.999992	1.42492e-23		Msun	2e+30	kg																						0
5.1				0.00392754			9.32051e+16		5.1	8.14067e-23	2.2e-28		5.1	64.3372	55.6346	50		0.999997	0.999999	8.14065e-23		MG	60000000000	Msun	1ly	9460000000000000																				0
10.1				0.0193019			6.42581e+17		10.1	2.02017e-22	2.2e-28		10.1	143.207	146.079	110		0.999999	0.999999	2.02017e-22		MG	1.2e+41																							0
15.1				0.0180058			1.52491e+18		15.1	1.26051e-22	2.2e-28		15.1	214.76	225.033	200		0.999998	0.999999	1.2605e-22																										0
20.1				0.00551558			2.08119e+18		20.1	2.90073e-23	2.2e-28		20.1	255.734	262.893	240		0.999989	0.999996	2.90071e-23		G <density>	1.52793e+36	kg/kly																						0
25.1				0.000772605			2.2299e+18		25.1	3.25403e-24	2.2e-28		25.1	270.072	272.116	265		0.999842	0.999966	3.25381e-24			1.80481e-21	kg/m3																						0
30.1				5.57541e-05			2.24949e+18		30.1	1.96023e-25	2.2e-28		30.1	271.959	273.164	270		0.996045	0.999439	1.95803e-25																										0
35.1				2.43591e-06			2.25087e+18		35.1	7.55607e-27	2.2e-28		35.1	263.625	269.392	263		0.964313	0.985335	7.33607e-27		U <density>	2.2e-28	kg/m3																						0
40.1				3.08402e-07			2.25093e+18		40.1	1.03298e-27	2.2e-28		40.1	247.583	242.55	252		0.905557	0.887144	8.12984e-28																										0
45.1				2.72908e-07			2.25095e+18		45.1	8.59659e-28	2.2e-28		45.1	236.997	235.841	242		0.866831	0.862603	6.39659e-28																										0
50.1				2.83312e-07			2.25096e+18		50.1	8.17773e-28	2.2e-28		50.1	233.757	233.755	232		0.854979	0.854972	5.97773e-28																										0
55.1				2.92018e-07			2.25097e+18		55.1	7.80231e-28	2.2e-28		55.1	231.661	231.677	225		0.847308	0.847368	5.60231e-28		c_kms	300000	km/s	Kuc2	4.11246e-54																				0
60.1				2.98632e-07			2.25099e+18		60.1	7.45256e-28	2.2e-28		60.1	229.516	229.533	222		0.839463	0.839523	5.25256e-28		c_ms	300000000	m/s																						0
65.1				3.03388e-07			2.251e+18		65.1	7.12636e-28	2.2e-28		65.1	227.306	227.323	221		0.831376	0.831437	4.92636e-28		K	2.077e-43	N-1																						0
70.1				3.06499e-07			2.25102e+18		70.1	6.82189e-28	2.2e-28		70.1	225.03	225.047	220		0.823049	0.823109	4.62189e-28																										0
75.1				3.08157e-07			2.25103e+18		75.1	6.53751e-28	2.2e-28		75.1	222.689	222.705	219		0.814484	0.814543	4.33751e-28					0	0																				0
80.1				3.08534e-07			2.25105e+18		80.1	6.27174e-28	2.2e-28		80.1	220.284	220.3	218		0.805684	0.805742	4.07174e-28		min dens	1.88735e-27																							0
85.1				3.07788e-07			2.25106e+18		85.1	6.02323e-28	2.2e-28		85.1	217.816	217.831	217		0.796654	0.79671	3.82323e-28																										0
90.1				3.06056e-07			2.25108e+18		90.1	5.79075e-28	2.2e-28		90.1	215.286	215.301	216		0.787399	0.787454	3.59075e-28		chi2	2040.86																							0
95.1				3.03465e-07			2.25109e+18		95.1	5.57316e-28	2.2e-28		95.1	213.358	212.711	215		0.780348	0.777979	3.37316e-28																										0
															212.711				0.777979
										4.94338e-21
																			a	2.1e-22
																			b	0.0463668
																			k	1.7
																			p	1.2e-27
																			m	0.0179223
																			qf	0.935246
																				11
																			ρu in eq. 43	2.2e-28
																			chi speed	1834.31
																				745.924

## Sheet: M81
r [kly]				r(d-du) [kg/m2]			in r(d-du) [kg/m]		l	dens [kg/m3]	u		l	speed smth	speed [km/s]	TRUE speed	l	dra smooth	dragging	d-du
0.1				0.00473			0		0.1	5e-21	2.2e-28		0.1	1	0	0		1	1	5e-21		Msun	2e+30	kg																						0
5.1				0.0294151			8.07532e+17		5.1	6.09691e-22	2.2e-28		5.1	142.74	163.759	166		1	1	6.0969e-22		MG	60000000000	Msun	1ly	9460000000000000																				0
10.1				0.0118989			1.78461e+18		10.1	1.24536e-22	2.2e-28		10.1	228.621	243.443	223		0.999996	0.999999	1.24536e-22		MG	1.2e+41																							0
15.1				0.00127806			2.09624e+18		15.1	8.94733e-24	2.2e-28		15.1	259.199	263.84	255		0.999872	0.999988	8.94711e-24																										0
20.1				4.30946e-05			2.12749e+18		20.1	2.2686e-25	2.2e-28		20.1	262.536	265.674	260		0.989494	0.999515	2.2664e-25		G <density>	1.52793e+36	kg/kly																						0
25.1				5.97488e-07			2.12852e+18		25.1	2.73631e-27	2.2e-28		25.1	248.075	254.955	253		0.933139	0.958958	2.51631e-27			1.80481e-21	kg/m3																						0
30.1				1.24036e-07			2.12854e+18		30.1	6.55602e-28	2.2e-28		30.1	224.59	216.716	237		0.844743	0.815126	4.35602e-28																										0
35.1				1.2109e-07			2.12855e+18		35.1	5.84677e-28	2.2e-28		35.1	210.031	209.973	220		0.789981	0.789762	3.64677e-28		U <density>	2.2e-28	kg/m3																						0
40.1				1.17956e-07			2.12855e+18		40.1	5.30945e-28	2.2e-28		40.1	203.398	203.463	210		0.765032	0.765274	3.10945e-28																										0
45.1				1.13491e-07			2.12856e+18		45.1	4.86008e-28	2.2e-28		45.1	196.642	196.695	198		0.739618	0.739819	2.66008e-28																										0
50.1				1.08163e-07			2.12856e+18		50.1	4.48217e-28	2.2e-28		50.1	189.672	189.714	187		0.713404	0.713559	2.28217e-28																										0
55.1				1.02316e-07			2.12857e+18		55.1	4.16292e-28	2.2e-28		55.1	182.538	182.567	178		0.686569	0.686677	1.96292e-28		c_kms	300000	km/s	Kuc2	4.11246e-54																				0
60.1				9.62069e-08			2.12857e+18		60.1	3.89216e-28	2.2e-28		60.1	175.29	175.305	168		0.659305	0.659364	1.69216e-28		c_ms	300000000	m/s																						0
65.1				9.00201e-08			2.12858e+18		65.1	3.66173e-28	2.2e-28		65.1	167.978	167.981	160		0.631805	0.631816	1.46173e-28		K	2.077e-43	N-1																						0
70.1				8.38905e-08			2.12858e+18		70.1	3.46504e-28	2.2e-28		70.1	160.655	160.645	153		0.604258	0.604224	1.26504e-28																										0
75.1				7.79135e-08			2.12858e+18		75.1	3.29668e-28	2.2e-28		75.1	153.367	153.346	150		0.576846	0.576769	1.09668e-28					0	0																				0
80.1				7.21554e-08			2.12859e+18		80.1	3.15224e-28	2.2e-28		80.1	146.159	146.128	147		0.549735	0.549621	9.52237e-29		min dens	1.88735e-27																							0
85.1				6.66599e-08			2.12859e+18		85.1	3.02803e-28	2.2e-28		85.1	139.071	139.032	144		0.523075	0.522928	8.28026e-29																										0
90.1				6.1454e-08			2.12859e+18		90.1	2.921e-28	2.2e-28		90.1	132.137	132.091	142		0.496997	0.496823	7.20998e-29		chi2	1452.78																							0
95.1				5.65523e-08			2.1286e+18		95.1	2.82861e-28	2.2e-28		95.1	127.025	125.336	141		0.477767	0.471415	6.28606e-29																										0
															125.336				0.471415
										5.0069e-21
									target	1.87755e-06				8.39452e-07					nf	1.05e-21
																			bf	0.0208995
																			kf	2
																			pf	1.41782e-27
																			mf	0.07
																			qf	0.833338
																			uf	2.2e-28
																			chi speed	1451.78
																				0
																				5.0069e-21

## Sheet: M101 & fit parameters
r [kly]				r(d-du) [kg/m2]			in r(d-du) [kg/m]		l	dens [kg/m3]	u		l	speed smth	speed [km/s]	TRUE speed		drag smooth	dragging	d-du [kg/m3]
0.1				5.01652e-05			0		0.1	5.3029e-23	2.2e-28		0.1	1	0	0		1	0.999998	5.30288e-23		Msun	2e+30	kg
5.1				0.00243207			5.87048e+16		5.1	5.04099e-23	2.2e-28		5.1	43.1752	44.1531	50		0.999998	0.999998	5.04097e-23		MG	60000000000	Msun	bulge M81	10000000000	Msun
10.1				0.00415449			2.14477e+17		10.1	4.34818e-23	2.2e-28		10.1	83.0299	84.3946	90		0.999997	0.999997	4.34816e-23		MG	1.2e+41	kg	radius	9.78	kly
15.1				0.00486126			4.27699e+17		15.1	3.40317e-23	2.2e-28		15.1	117.455	119.177	120		0.999997	0.999997	3.40315e-23
20.1				0.00459549			6.51351e+17		20.1	2.41684e-23	2.2e-28		20.1	145.271	147.072	145		0.999995	0.999995	2.41682e-23		G <density>	1.52793e+36	kg/kly	bulge dens	6.02909e-21	kg/m3
25.1				0.00369808			8.47494e+17		25.1	1.55746e-23	2.2e-28		25.1	166.122	167.761	165		0.999992	0.999993	1.55744e-23			1.80481e-21	kg/m3
30.1				0.00259343			9.96289e+17		30.1	9.10811e-24	2.2e-28		30.1	180.571	181.892	180		0.999987	0.999988	9.10789e-24
35.1				0.00160523			1.09559e+18		35.1	4.83459e-24	2.2e-28		35.1	189.79	190.739	190		0.999974	0.999977	4.83437e-24		U <density>	2.2e-28	kg/m3	1ly	9460000000000000	m
40.1				0.00088389			1.15445e+18		40.1	2.33026e-24	2.2e-28		40.1	195.182	195.791	198		0.999944	0.999953	2.33004e-24
45.1				0.000435518			1.18566e+18		45.1	1.02101e-24	2.2e-28		45.1	198.056	198.408	203		0.999867	0.999892	1.02079e-24
50.1				0.000193197			1.20053e+18		50.1	4.07855e-25	2.2e-28		50.1	199.424	199.616	203		0.999654	0.99973	4.07635e-25
55.1				7.79441e-05			1.20694e+18		55.1	1.49754e-25	2.2e-28		55.1	199.928	200.055	202		0.999033	0.999265	1.49534e-25		c_kms	300000	km/s	Kuc2	4.11246e-54
60.1				2.93063e-05			1.20948e+18		60.1	5.1766e-26	2.2e-28		60.1	199.823	199.986	201		0.997222	0.997873	5.1546e-26		c_ms	300000000	m/s
65.1				1.09592e-05			1.21043e+18		65.1	1.80154e-26	2.2e-28		65.1	198.998	199.263	200		0.992615	0.993875	1.77954e-26		K	2.077e-43	N-1
70.1				4.70176e-06			1.2108e+18		70.1	7.31008e-27	2.2e-28		70.1	197.306	197.481	198		0.983983	0.984837	7.09008e-27		G	6.7e-11	N m2 / kg2
75.1				2.71315e-06			1.21097e+18		75.1	4.03895e-27	2.2e-28		75.1	195.099	194.998	197		0.972893	0.972384	3.81895e-27
80.1				2.06725e-06			1.21109e+18		80.1	2.94816e-27	2.2e-28		80.1	193.051	192.918	195		0.962628	0.961965	2.72816e-27		min dens	1.88735e-27
85.1				1.80168e-06			1.21118e+18		85.1	2.45799e-27	2.2e-28		85.1	191.406	191.368	193		0.954393	0.954199	2.23799e-27
90.1				1.63664e-06			1.21126e+18		90.1	2.14016e-27	2.2e-28		90.1	189.957	189.972	191		0.947132	0.947208	1.92016e-27		chi2	137.666
95.1				1.50002e-06			1.21134e+18		95.1	1.88735e-27	2.2e-28		95.1	188.879	188.515	189		0.706758	0.939912	1.66735e-27
															188.515
										1.70122e-21										fitting parameters of eq. 20-21
																				M101	M81	M31			1/(8pi2)	0.0126651
																			a	5.3e-23	1.05e-21	2.1e-22
																			b	0.00194517	0.0208995	0.0463668
																			k	2	2	1.7
																			p	3e-26	1.41782e-27	1.2e-27
																			m	0.0466071	0.07	0.0179223		0.0466071	0.07
																			q	0.906161	0.833338	0.935246
																						11
																								chi total
																			chi speed	137.666	1451.78	1834.31		3423.75
																			ρu in eq. 43	2.2e-28	2.2e-28	2.2e-28
																			uf
																			lum mass	30	76	12
																			ratio		2.53333	0.4
																			dens int	1.70122e-21	5.0069e-21	4.94338e-21
																					2.94312	2.90578
																			chi mass		6.44685
																				1.57501e-06	8.36744e-07	9.77558e-07

## Sheet: M31 with & without universe
r [kly]				r(d-du) [kg/m2]			in r(d-du) [kg/m]		l	dens [kg/m3]	u		l	speed smth	speed [km/s]	TRUE speed		dra smooth	dragging	d-du
0.1				1.34797e-05			0		0.1	1.42494e-23	0		0.1	1	0	0		1	1	1.42492e-23		Msun	2e+30	kg																						0
5.1				0.00392754			9.32051e+16		5.1	8.14067e-23	0		5.1	64.3372	55.6347	50		1	1	8.14065e-23		MG	60000000000	Msun	1ly	9460000000000000																				0
10.1				0.0193019			6.42581e+17		10.1	2.02017e-22	0		10.1	143.207	146.08	110		1	1	2.02017e-22		MG	1.2e+41																							0
15.1				0.0180058			1.52491e+18		15.1	1.26051e-22	0		15.1	214.76	225.034	200		1	1	1.2605e-22																										0
20.1				0.00551558			2.08119e+18		20.1	2.90073e-23	0		20.1	255.737	262.894	240		1	1	2.90071e-23		G <density>	1.52793e+36	kg/kly																						0
25.1				0.000772605			2.2299e+18		25.1	3.25403e-24	0		25.1	270.116	272.125	265		1	1	3.25381e-24			1.80481e-21	kg/m3																						0
30.1				5.57541e-05			2.24949e+18		30.1	1.96023e-25	0		30.1	273.041	273.318	270		1	1	1.95803e-25																										0
35.1				2.43591e-06			2.25087e+18		35.1	7.55607e-27	0		35.1	273.382	273.401	263		1	1	7.33607e-27		U <density>	0	kg/m3																						0
40.1				3.08402e-07			2.25093e+18		40.1	1.03298e-27	0		40.1	273.405	273.405	252		1	1	8.12984e-28																										0
45.1				2.72908e-07			2.25095e+18		45.1	8.59659e-28	0		45.1	273.406	273.406	242		1	1	6.39659e-28																										0
50.1				2.83312e-07			2.25096e+18		50.1	8.17773e-28	0		50.1	273.407	273.407	232		1	1	5.97773e-28																										0
55.1				2.92018e-07			2.25097e+18		55.1	7.80231e-28	0		55.1	273.408	273.408	225		1	1	5.60231e-28		c_kms	300000	km/s	Kuc2	4.11246e-54																				0
60.1				2.98632e-07			2.25099e+18		60.1	7.45256e-28	0		60.1	273.409	273.409	222		1	1	5.25256e-28		c_ms	300000000	m/s																						0
65.1				3.03388e-07			2.251e+18		65.1	7.12636e-28	0		65.1	273.41	273.41	221		1	1	4.92636e-28		K	2.077e-43	N-1																						0
70.1				3.06499e-07			2.25102e+18		70.1	6.82189e-28	0		70.1	273.41	273.41	220		1	1	4.62189e-28																										0
75.1				3.08157e-07			2.25103e+18		75.1	6.53751e-28	0		75.1	273.411	273.411	219		1	1	4.33751e-28					0	0																				0
80.1				3.08534e-07			2.25105e+18		80.1	6.27174e-28	0		80.1	273.412	273.412	218		1	1	4.07174e-28		min dens	1.88735e-27																							0
85.1				3.07788e-07			2.25106e+18		85.1	6.02323e-28	0		85.1	273.413	273.413	217		1	1	3.82323e-28																										0
90.1				3.06056e-07			2.25108e+18		90.1	5.79075e-28	0		90.1	273.414	273.414	216		1	1	3.59075e-28		chi2	31584.8																							0
95.1				3.03465e-07			2.25109e+18		95.1	5.57316e-28	0		95.1	273.415	273.415	215		1	1	3.37316e-28																										0
															273.415				1
										4.94338e-21
																			a	2.1e-22
																			b	0.0463668
																			k	1.7
																			p	1.2e-27
																			m	0.0179223
																			qf	0.935246
																				11
																			ρu in eq. 43	2.2e-28
																			chi speed	31378.2
																				745.924

## Sheet: M81 with & without universe
r [kly]				r(d-du) [kg/m2]			in r(d-du) [kg/m]		l	dens [kg/m3]	u		l	speed smth	speed [km/s]	TRUE speed	l	dra smooth	dragging	d-du
0.1				0.00473			0		0.1	5e-21	0		0.1	1	0	0		1	1	5e-21		Msun	2e+30	kg																						0
5.1				0.0294151			8.07532e+17		5.1	6.09691e-22	0		5.1	142.74	163.759	166		1	1	6.0969e-22		MG	60000000000	Msun	bulge M81	10000000000																				0
10.1				0.0118989			1.78461e+18		10.1	1.24536e-22	0		10.1	228.622	243.443	223		1	1	1.24536e-22		MG	1.2e+41		radius	9.78																				0
15.1				0.00127806			2.09624e+18		15.1	8.94733e-24	0		15.1	259.233	263.844	255		1	1	8.94711e-24																										0
20.1				4.30946e-05			2.12749e+18		20.1	2.2686e-25	0		20.1	265.329	265.803	260		1	1	2.2664e-25		G <density>	1.52793e+36	kg/kly	bulge dens	6.02909e-21																				0
25.1				5.97488e-07			2.12852e+18		25.1	2.73631e-27	0		25.1	265.851	265.867	253		1	1	2.51631e-27			1.80481e-21	kg/m3																						0
30.1				1.24036e-07			2.12854e+18		30.1	6.55602e-28	0		30.1	265.868	265.868	237		1	1	4.35602e-28																										0
35.1				1.2109e-07			2.12855e+18		35.1	5.84677e-28	0		35.1	265.869	265.869	220		1	1	3.64677e-28		U <density>	0	kg/m3	1ly	9460000000000000																				0
40.1				1.17956e-07			2.12855e+18		40.1	5.30945e-28	0		40.1	265.869	265.869	210		1	1	3.10945e-28																										0
45.1				1.13491e-07			2.12856e+18		45.1	4.86008e-28	0		45.1	265.869	265.869	198		1	1	2.66008e-28																										0
50.1				1.08163e-07			2.12856e+18		50.1	4.48217e-28	0		50.1	265.87	265.87	187		1	1	2.28217e-28																										0
55.1				1.02316e-07			2.12857e+18		55.1	4.16292e-28	0		55.1	265.87	265.87	178		1	1	1.96292e-28		c_kms	300000	km/s	Kuc2	4.11246e-54																				0
60.1				9.62069e-08			2.12857e+18		60.1	3.89216e-28	0		60.1	265.87	265.87	168		1	1	1.69216e-28		c_ms	300000000	m/s																						0
65.1				9.00201e-08			2.12858e+18		65.1	3.66173e-28	0		65.1	265.871	265.871	160		1	1	1.46173e-28		K	2.077e-43	N-1																						0
70.1				8.38905e-08			2.12858e+18		70.1	3.46504e-28	0		70.1	265.871	265.871	153		1	1	1.26504e-28																										0
75.1				7.79135e-08			2.12858e+18		75.1	3.29668e-28	0		75.1	265.871	265.871	150		1	1	1.09668e-28																										0
80.1				7.21554e-08			2.12859e+18		80.1	3.15224e-28	0		80.1	265.871	265.871	147		1	1	9.52237e-29		min dens	1.88735e-27																							0
85.1				6.66599e-08			2.12859e+18		85.1	3.02803e-28	0		85.1	265.871	265.871	144		1	1	8.28026e-29																										0
90.1				6.1454e-08			2.12859e+18		90.1	2.921e-28	0		90.1	265.872	265.872	142		1	1	7.20998e-29		chi2	132265																							0
95.1				5.65523e-08			2.1286e+18		95.1	2.82861e-28	0		95.1	265.872	265.872	141		1	1	6.28606e-29																										0
															265.872				1
										5.0069e-21
									target	1.87755e-06				8.39452e-07					nf	1.05e-21
																			bf	0.0208995
																			kf	2
																			pf	1.41782e-27
																			mf	0.07
																			qf	0.833338
																			uf	2.2e-28
																			chi speed	132264
																				0
																				5.0069e-21
